# Supplementary material for: Boosting the Immune System, From Science to Myth: Analysis the Infosphere With Google
Source: Front Med (Lausanne). 2019 Jul 25;6:165. doi: 10.3389/fmed.2019.00165 (PMC6673706; doi:10.3389/fmed.2019.00165)
Supplement: Supplementary File 1 — List of webpages analyzed and their classification. [file Table_1.XLSX]

## Sheet: Sheet1
				JAMA	JAMA	JAMA	JAMA	JAMA	HON	DISEASE	DISEASE	DISEASE	DISEASE	DISEASE	DISEASE	DISEASE	boost	boost	boost	boost	boost	boost	boost	boost	boost	boost	boost	boost	boost	boost	boost	boost	boost	boost	boost	boost	boost	boost	boost	boost	boost	boost	boost	boost	boost	boost	boost	boost	boost
Ranking	link	Type	Type2	Author	Date	References	Owner	JAMA	HON	Infection (include influenza)	cancer	inflammatory	respiratory-cough-throat	aids/sida	gastro intestinal	chronic diseases (diabetes, hypertension etc.)	vitamins	VitC	garlic	ginger	chocolate	echinacea	herbal, tea, spices	fruit-vegetables (incl. oregano, broccoli, kale…)	juices/smoothies	citrus fruit (orange, lemon etc)	probiotics, yogurt	antioxidants (incl. vitE and glutathione)	various supplements (incl. flavonoids)	oils	minerals (selenium etc)	diet (includes avoiding things)	activity-exercise	other lifestyle (sleep, don't get drunk/smoke, stay warm etc)	stay hydrated	manage stress (yoga, music, play etc)	hygiene (wash yourself)	vaccination	cereals, grains	active sexual life	soups (chicken soup etc)	mushrooms	cryotherapy / exposure to cold	honey	control allergies	avoid excess of medications	fish and seafood	breastfeeding	sauna / increase of body temperature
1	https://www.everydayhealth.com/columns/white-seeber-grogan-the-remedy-chicks/ten-simple-natural-ways-to-boost-immune-system/	N		1	1	1	1	4	1	1									1			1	1	1			1							1		1
2	https://www.health.harvard.edu/staying-healthy/how-to-boost-your-immune-system	P		0	1	0	1	2	0	1																						1		1			1
3	https://www.healthline.com/health/food-nutrition/foods-that-boost-the-immune-system	N		1	1	1	1	4	1										1				1	1		1	1					1
4	https://www.healthline.com/health/immunodeficiency-disorders	EXCLUDE
5	https://health.clevelandclinic.org/3-vitamins-best-boosting-immunity/	P		0	1	0	1	2	0								1	1						1				1						1	1
6	https://www.health.harvard.edu/staying-healthy/how-to-boost-your-immune-system	P		0	1	0	1	2	0	1																						1		1			1
7	https://www.everydayhealth.com/columns/white-seeber-grogan-the-remedy-chicks/ten-simple-natural-ways-to-boost-immune-system/	N		1	1	1	1	4	1	1									1			1	1	1			1							1		1
8	https://www.healthline.com/health/food-nutrition/foods-that-boost-the-immune-system	N		1	1	1	1	4	1										1				1	1		1	1					1
9	https://www.theguardian.com/science/2016/jan/24/health-foods-immune-system-colds-vitamins	N		1	1	0	1	3	0	1																						1	1					1
10	https://www.independent.co.uk/life-style/health-and-families/immune-system-how-to-boost-health-wellbeing-stop-colds-infections-exercise-sleep-a8375951.html	N		1	1	1	1	4	0			1							1					1										1	1
11	https://health.clevelandclinic.org/3-vitamins-best-boosting-immunity/	P		0	1	0	1	2	0								1	1						1				1						1	1
12	https://www.medicalnewstoday.com/articles/322412.php	N		1	1	1	1	4	1	1							1	1	1	1	1		1	1			1	1				1
13	http://www.hollandandbarrett.com/the-health-hub/boost-immune-system-naturally/	C		0	0	0	0	0	0	1							1						1				1		1		1	1	1	1
14	https://www.webmd.com/cold-and-flu/cold-guide/10-immune-system-busters-boosters	HP		1	1	0	1	3	1	1		1					1	1						1				1			1	1	1	1		1
15	https://www.saga.co.uk/magazine/health-wellbeing/wellbeing/10-ways-boost-immune-system	N		1	1	0	1	3	0	1									1					1			1						1	1		1			1	1
16	https://www.gohealthuc.com/library/4-ways-boost-your-immune-system-stop-sickness-its-tracks	C		0	0	1	1	2	0								1	1						1				1	1		1	1			1		1
17	http://www.bbc.co.uk/programmes/articles/1bGNzff3qDWhyXKFchKJb6h/can-i-really-boost-my-immune-system	N		0	0	1	1	2	0																							1	1
18	https://www.nhs.uk/news/lifestyle-and-exercise/vitamin-d-immune-system-boost/	G		1	1	1	1	4	0
19	https://bodyandhealth.canada.com/healthfeature/gethealthfeature/how-to-boost-your-immune-system	N		0	0	0	1	1	0	1							1	1						1		1		1	1	1	1	1	1	1		1	1
20	https://www.popsci.com/is-it-possible-to-boost-your-immune-system	N		1	1	0	1	3	0	1			1				1						1	1				1			1	1		1				1
21	https://www.prevention.com/food-nutrition/healthy-eating/a20503059/power-foods-that-boost-immunity/	N		1	1	1	1	4	0	1	1		1	1	1		1	1	1			1	1	1		1	1				1	1	1	1		1	1	1	1		1	1					1
22	https://www.vogue.co.uk/article/how-to-boost-immunity	N		1	1	0	1	3	0	1									1	1							1		1			1	1			1							1
23	https://www.health.com/cold-flu-sinus/boost-immune-system	N		1	0	0	1	2	0	1														1			1					1	1	1			1		1
24	https://www.consciouslifestylemag.com/immune-boosting-foods-herbs/	N		1	0	1	1	3	0	1	1	1					1						1	1								1										1
25	https://www.rd.com/health/conditions/boost-immune-system/	N		1	0	0	1	2	0	1	1						1	1	1	1			1	1		1				1		1	1			1						1
26	https://www.comvita.com.au/blog-article/7-surprising-ways-to-boost-your-immune-system/2000195	C		1	1	0	1	3	0	1							1	1		1			1	1	1	1	1		1		1								1
27	https://iboostimmunity.com/	EXCLUDE						0
28	https://www.eatthis.com/immune-boosting-foods/	N		1	1	1	1	4	0	1			1		1		1	1	1	1	1		1	1		1	1	1		1	1	1			1			1	1		1	1		1
29	https://economictimes.indiatimes.com/magazines/panache/be-cautious-this-season-superfoods-to-boost-immunity-and-keep-you-healthy/immunity-boosting-foods/slideshow/62860717.cms	N		1	1	0	1	3	0	1	1					1	1	1	1	1			1	1		1	1	1		1	1	1							1					1
30	https://hormonesbalance.com/articles/14-ways-to-boost-your-immunity-this-winter/	C		1	0	1	1	3	0	1	1	1		1			1		1			1	1	1			1	1	1		1	1	1	1	1	1	1				1	1			1
31	https://sciencebasedmedicine.org/boost-your-immune-system/	O		1	1	1	1	4	0																							1		1				1
32	https://www.boostjuice.com.au/drinks/immunity-juice/	EXCLUDE						0
33	https://health.usnews.com/wellness/slideshows/9-ways-to-boost-your-immune-system	N		1	1	0	1	3	0	1			1				1							1			1	1				1	1	1				1	1
34	https://www.eatright.org/health/wellness/preventing-illness/protect-your-health-with-immune-boosting-nutrition	P		1	1	0	1	3	0	1	1	1	1		1		1	1						1			1				1	1
35	https://www.dabur.com/dabur-chyawanprash/how-to-increase-immunity.aspx	C		0	0	0	0	0	0	1			1				1	1	1	1			1		1		1	1				1	1	1		1	1		1							1
36	https://www.stylecraze.com/articles/effective-home-remedies-to-boost-your-immune-system/	O		1	1	1	1	4	0	1	1			1	1		1	1	1	1		1	1	1	1	1	1	1		1	1	1	1	1	1	1	1	1						1			1
37	https://www.cookinglight.com/healthy-living/health/what-to-eat-to-boost-immunity	C		1	1	0	1	3	0	1	1	1	0	0	0	0	1							1			1	1		1	1	1		1					1								1
38	https://nutritionfacts.org/2018/08/21/what-to-eat-to-boost-immunity/	NP		1	1	1	1	4	1	1			1											1	1							1
39	https://www.xendurance.com/immune-boost	C		0	0	0	1	1	0	0	0	0	0	0	0	0	1											1			1
40	https://www.skepticalraptor.com/skepticalraptorblog.php/immune-system-myths-boost/	B		0	1	1	0	2	0	1	1	1		1		1																						1
41	https://carmelmountain.net/5-easy-ways-to-boost-your-immune-system/	B		0	1	1	1	3	0	1			1				1	1						1	1	1		1		1	1	1	1	1		1	1	1									1
42	http://www.who.int/vaccine_safety/initiative/communication/network/ibi/en/	EXCLUDE						0
43	https://www.gaiam.com/blogs/discover/7-ways-to-boost-your-immune-system	B		1	0	0	1	2	0	1							1		1				1				1	1	1	1		1	1	1								1	1				1
44	https://goodnessme.ca/blogs/goodness-me/21-immune-boosting-foods-tonics-teas	C		1	1	1	1	4	0	1			1		1		1		1	1		1	1	1		1		1	1	1	1	1		1		1						1
45	https://www.armidaleexpress.com.au/story/5568549/boost-immunity-for-winter-wellness/?cs=13254	EXCLUDE						0
46	https://www.abc.net.au/news/health/2016-08-26/how-do-you-boost-your-immune-system/7541620	N		1	1	1	1	4	0	1		1	1				1						1								1	1	1	1		1		1
47	https://www.doctoroz.com/slideshow/boost-your-immunity-naturally	O		0	0	0	1	1	0	1	1		1				1	1		1			1	1				1	1	1	1								1			1
48	https://drwillcole.com/8-ways-to-naturally-boost-your-childs-immune-system/	B		1	1	1	1	4	0	1		1				1	1	1						1	1	1	1	1	1	1		1	1	1	1											1		1
49	https://edition.cnn.com/2017/02/06/health/foods-boost-immune-system-diet-partner/index.html	N		1	1	1	1	4	0	1		1	1		1		1	1	1				1	1		1	1	1		1	1	1	1		1		1		1		1						1
50	https://universityhealthnews.com/daily/nutrition/how-to-boost-your-immune-system/	O		1	1	1	1	4	0	1	1		1	1	1	1	1	1				1	1				1	1	1		1
51	https://foodrevolution.org/blog/how-to-boost-immune-system/	B		1	1	1	1	4	0	1	1		1		1		1	1	1	1			1	1		1	1	1	1		1	1				1	1					1
52	http://veriditasbotanicals.com/products/wellness-blends/immunity-boost/	C		0	0	0	1	1	0																					1
53	https://kidsboostimmunity.com/sample-lessons	G		0	1	0	1	2	0	1																												1
54	https://www.amazon.com/Boost-Your-Immune-System-Strengthening/dp/1680228609	C		0	1	0	1	2	0								1						1									1	1	1		1
55	https://www.foodnetwork.com/healthy/packages/healthy-every-week/healthy-tips/fresh-foods-to-boost-immunity	N		1	0	0	1	2	0	1			1				1	1	1	1			1	1		1	1	1			1	1									1						1
56	https://www.aplaceformom.com/blog/2013-12-26-strenghening-seniors-immune-system/	C		1	1	1	1	4	0	1			1		1		1	1				1	1	1			1	1	1			1	1	1	1	1	1	1			1
57	https://jonbarron.org/immunity/health-program-boost-immune-system-flu-1	C		0	0	1	1	2	0	1	1	1	1										1	1					1	1	1	1		1
58	https://www.mindbodygreen.com/articles/all-natural-ways-to-boost-your-immune-system	C		1	0	1	1	3	0	1	1	1	1		1		1	1	1								1	1	1	1	1	1	1	1		1					1	1		1		1		1	1
59	https://www.lorizanini.com/boostyourimmunity/	B		1	0	1	1	3	0	1			1				1		1	1			1	1			1		1			1
60	https://urbanremedy.com/boost-your-immunity-for-cold-season-with-pomegranate/	C		1	1	0	1	3	0	1	1		1				1	1						1				1			1
61	https://academic.oup.com/cid/article/33/11/1892/446157	S		1	1	1	1	4	0	1	1		1		1	1	1	1							1			1	1		1	1														1
62	https://www.realsimple.com/health/preventative-health/boost-immunity	N		1	0	0	1	2	0	1			1		1		1	1						1			1	1		1		1	1	1		1											1
63	https://www.ndtv.com/food/winter-is-coming-boost-your-immunity-with-these-6-magical-foods-1929364	N		0	1	0	1	2	0	1			1				1	1	1	1			1	1		1		1			1	1										1
64	https://legionathletics.com/best-immunity-boosting-supplements/	C		1	0	1	1	3	0	1	1	1	1						1			1	1	1					1			1	1	1			1					1
65	https://www.huffpost.com/entry/boost-immune-system-naturally_n_56bc138ee4b0b40245c56060	N		1	1	1	1	4	0	1	1		1		1		1	1	1	1			1	1		1	1	1				1	1	1		1	1	1			1			1
66	https://www.ncbi.nlm.nih.gov/pubmed/19263912	S		1	1	0	1	3	0	1			1				1	1
67	https://www.shape.com/lifestyle/mind-and-body/10-easy-ways-boost-your-immunity	N		0	0	0	1	1	0	1	1		1											1						1		1	1	1	1	1
68	https://www.amazon.co.uk/Eat-Boost-Your-Immunity-Strengthening/dp/1780280289	C		1	1	0	1	3	0																							1
69	https://www.verywellhealth.com/ways-to-boost-your-immune-system-naturally-89283	HP		1	1	1	1	4	1	1			1				1	1	1	1		1	1	1				1	1	1		1	1	1	1	1	1
70	https://www.parents.com/health/cold-flu/cold/boost-childs-immunity/	N		1	0	0	1	2	0	1	1	1	1		1	1	1	1						1		1						1	1	1			1									1		1
71	https://healthyeating.sfgate.com/eating-healthy-foods-boost-immunity-8321.html	N		1	0	1	1	3	0	1	1		1				1	1						1	1	1	1	1		1		1	1	1
72	https://www.canadian.cz/en/medical-articles/boost-your-child-s-immune-system-as-early-as-possible	C		0	1	0	1	2	0	1			1				1	1	1				1	1			1		1		1	1	1	1		1	1											1
73	https://www.geisinger.org/health-and-wellness/wellness-articles/2018/01/19/14/09/6-foods-to-boost-your-immune-system-through-cold-and-flu-season	C		1	1	0	1	3	0	1			1				1	1					1	1	1	1		1			1	1		1			1	1				1
74	https://www.hindustantimes.com/fitness/how-to-make-your-immune-system-strong-with-diet-and-lifestyle-changes/story-tAqG4seCksS2TyIqJAvuDJ.html	N		1	1	0	1	3	0	1			1				1	1	1				1	1			1	1				1	1	1					1			1
75	https://www.avogel.co.uk/health/immune-system/how-can-diet-boost-our-immune-system/	C		1	1	1	1	4	0	1			1				1	1	1	1		1	1	1	1	1	1	1	1		1	1			1				1			1
76	https://www.theactivetimes.com/content/15-foods-boost-your-immune-system	N		0	0	1	1	2	0	1		1	1				1	1	1	1	1		1	1		1	1	1		1	1	1	1			1	1				1	1
77	https://chopra.com/articles/5-ways-to-boost-your-immunity	C		1	0	1	1	3	0	1		1	1		1		1	1	1	1			1	1	1	1	1	1	1			1		1		1
78	https://www.verywellfamily.com/best-foods-boost-immune-system-4020423	HP		1	1	1	1	4	1	1	1		1		1	1	1	1	1		1			1	1		1	1		1	1	1							1			1		1			1
79	https://www.businessinsider.com/why-you-cant-boost-your-immune-system-with-supplements-2016-1	N		1	1	1	1	4	0	1		1	1		1		1	1						1							1	1	1			1	1	1
80	http://www.mapi.com/ayurvedic-knowledge/food-tips/ayurvedic-foods-that-boost-immunity.html	C		0	0	0	1	1	0	1			1										1	1	1			1	1	1	1	1		1					1
81	https://www.active.com/fitness/articles/how-yoga-can-help-boost-your-immune-system	O		1	0	0	1	2	0	1			1		1																	1				1	1
82	https://medlineplus.gov/ency/article/007165.htm	G		0	0	0	1	1	0	1			1																				1
83	https://www.smallfootprintfamily.com/10-ways-to-strengthen-your-immune-system	B		1	0	0	1	2	0	1			1				1	1	1	1			1	1			1	1	1	1	1	1		1	1		1				1	1		1			1
84	http://www.renewlife.ca/blog/boost-immune-cold-flu/	B		1	0	0	1	2	0	1			1				1	1	1	1		1	1	1	1	1	1	1	1	1	1	1		1	1	1	1		1					1
85	https://www.farmersalmanac.com/natural-immunity-boosters-29060	C		1	0	0	1	2	0	1	1	1	1				1	1	1	1			1	1		1	1	1	1	1	1	1	1		1						1			1			1
86	https://upfitness.com/en/article_posts/diet/nutrition/4-proven-ways-boost-immune-system	C		0	0	0	1	1	0	1	1		1				1	1	1		1		1	1			1	1	1		1	1	1	1		1											1
87	https://www.naturalproductsinsider.com/ingredients/ingredients-boost-immunity	N		0	0	0	1	1	0																		1	1	1		1	1	1	1		1
88	https://articles.mercola.com/sites/articles/archive/2018/02/01/boost-immune-system.aspx	HP		1	1	1	1	4	0	1	1	1	1			1	1	1			1		1	1	1	1	1	1			1	1	1	1		1						1				1	1
89	http://www.vaccinesafetynet.org/vsn/network/kids-boost-immunity	EXCLUDE						0
90	https://www.laughteronlineuniversity.com/laughter-immune-system/	B		1	0	1	1	3	0		1	1	1																							1
91	https://www.unitypoint.org/livewell/article.aspx?id=7ed35a9b-7295-4619-a0c1-f9e729cbb11d	P		0	0	0	1	1	0	1	1		1			1	1	1						1				1		1		1	1	1	1	1	1		1							1	1
92	https://thetruthaboutcancer.com/the-best-cancer-fighting-and-immune-boosting-food-choices-for-beating-and-avoiding-cancer/	O		1	0	1	1	3	0		1						1		1				1	1				1		1	1	1										1
93	https://drjockers.com/7-strategies-boost-immune-system/	C		1	0	1	1	3	0	1	1	1	1	1		1	1						1	1			1	1	1	1	1	1		1	1												1
94	https://www.alimillerrd.com/top-5-ways-to-boost-your-immune-system/	C		1	0	0	1	2	0	1	1	1					1	1						1		1	1		1		1	1	1	1		1										1
95	https://www.hcf.com.au/health-agenda/food-diet/nutrition/foods-to-boost-immunity	EXCLUDE						0
96	https://health.bastyr.edu/news/health-tips/2017/03/boost-your-immunity-naturally	P		1	1	0	1	3	0	1							1	1					1	1		1					1		1	1	1	1											1
97	https://www.vitalityextracts.com/products/immunity-boost-v	C		0	0	0	1	1	0																					1
98	https://www.harkerherbals.com/product/catalogue/be-well/be-well-immune-boost	C		0	0	0	1	1	0																				1
99	https://www.theherald.com.au/story/5568549/boost-immunity-for-winter-wellness/	EXCLUDE						0
100	https://juvenon.com/8-foods-that-fight-inflammation-and-boost-immune-system/	C					1	1	0		1	1				1	1			1				1				1				1							1								1
101	https://nutritiouslife.com/nurture-yourself/how-to-boost-your-immune-system-with-food/	C					1	0	0	1		1	1				1	1	1					1			1	1			1	1									1	1		1
102	https://www.practo.com/healthfeed/6-foods-that-can-boost-your-immunity-33663/post	P		1	1		1	3	0	1			1				1	1	1	1				1		1		1			1	1
103	https://www.homeoanimal.com/blogs/blog-pet-health/3-ways-to-naturally-boost-your-dogs-immune-system-at-home	EXCLUDE
104	https://www.linkedin.com/company/iboostimmunity	EXCLUDE							0
105	https://www.motherandbaby.co.uk/baby-and-toddler/baby-and-toddler-health-advice/how-to-boost-your-baby-s-immune-system	O		1			1	2	0	1			1				1	1						1				1		1	1	1		1			1		1								1	1
106	https://www.linkedin.com/company/iboostimmunity	EXCLUDE							0
107	https://www.motherandbaby.co.uk/baby-and-toddler/baby-and-toddler-health-advice/how-to-boost-your-baby-s-immune-system	EXCLUDE
108	https://cheribundi.com/pages/drink-tart-cherry-boost-immune-system	C					1	1	0															1	1			1	1		1	1
109	https://thespringssc.com/2018/07/natural-ways-boost-immune-system/	C			1		1	2	0	1			1				1		1					1	1						1	1	1	1	1	1
110	https://www.practo.com/healthfeed/6-foods-that-can-boost-your-immunity-33663/post	P		1	1		1	3	0	1			1				1	1	1	1				1		1		1			1	1
111	http://www.nutritionnews.abbott/healthy-moms-babies/six-ways-to-boost-your-child-s-immune-system.html	C		1	1		1	3	0	1			1		1									1			1					1	1	1					1									1
112	http://www.nestle-family.com/nutrition-for-all/english/boost-your-immunity-with-the-right-foods_044357.aspx	C						0	0	1			1				1	1	1					1			1	1		1	1	1	1						1								1
113	https://www.nursingtimes.net/home/behind-the-headlines/can-blueberries-and-red-wine-boost-immunity/5063500.article	N			1			1	0															1								1
114	https://skeptoid.com/episodes/4227	NP		1	1	1	1	4	0
115	https://www.health24.com/Medical/Flu/Health-tips/5-ways-to-boost-your-immune-system-in-summer-20171016	N		1	1	1	1	4	0	1			1											1	1		1	1	1	1		1		1			1										1
116	https://www.consumerreports.org/conditions-treatments/best-ways-to-boost-your-immune-system/	NP		1	1		1	3	0	1	1	1	1				1	1						1					1	1	1	1	1	1		1			1
117	http://www.eatingwell.com/recipes/22152/lifestyle-diets/healthy-immunity/healthy-immunity/slideshow/healthy-recipes-to-boost-immunity-ward-off-colds/	C					1	1	0	1		1	1				1	1					1	1	1		1				1	1							1		1
118	https://www.nuzest.co.nz/blog/top-tips-to-boost-immunity/	C		1			1	2	0	1		1	1				1							1				1	1	1		1		1					1								1
119	https://www.realbuzz.com/articles-interests/nutrition/article/top-foods-for-boosting-immunity/	C					1	1	0	1			1		1		1		1					1		1	1	1			1	1															1
120	https://www.eventbrite.ie/e/goodbye-to-colds-eating-to-boost-immunity-tickets-50775918138	EXCLUDE							0
121	https://thehealthychef.com/blogs/wellbeing/10-foods-to-boost-your-immune-system	C					1	1	0	1	1	1	1		1	1	1	1	1	1			1	1	1	1	1		1		1	1									1	1		1
122	https://www.hyperbiotics.com/blogs/recent-articles/8-ways-to-boost-your-immunity-this-winter	C		1		1	1	3	0	1		1	1		1		1	1	1				1	1	1	1	1	1	1	1	1	1	1	1		1	1										1
123	https://www.wimhofmethod.com/how-to-boost-your-immune-system	C					1	1	0	1		1	1			1	1										1		1			1	1	1		1							1
124	http://drgalland.com/amino-acids-boost-immunity-after-workouts/	B		1	1	1	1	4	0	1		1																	1
125	https://www.priceline.com.au/biosource-immune-boost-100-tablets	EXCLUDE							0
126	http://www.food.ubc.ca/four-foods-to-boost-immunity/	P		1		1	1	3	0	1			1			1	1	1						1		1	1					1	1	1			1		1
127	http://www.healtheries.co.nz/products/boost/detail/nz-products/boost/healtheries-boost-immunity-orange-effervescents	C					1	1	0	1			1				1	1				1	1					1	1		1
128	https://www.blackmores.com.au/action-plans/how-to-boost-your-immunity	C					1	1	0	1			1																1			1	1	1		1	1
129	https://www.nzherald.co.nz/lifestyle/news/article.cfm?c_id=6&objectid=11724602	N		1	1	1	1	4	0	1			1									1	1	1								1		1
130	https://www.forbes.com/sites/alicegwalton/2016/09/06/new-clues-into-how-meditation-can-boost-the-immune-system/	N		1	1	1	1	4	0	1						1																				1
131	https://www.facebook.com/iboostimmunity/	EXCLUDE						0
132	https://www.healthpost.co.nz/health-concerns/colds-flu-and-allergy/immune-formulas	C					1	1	0	1																			1			1
133	https://www.culinarynutrition.com/how-to-boost-your-immune-system-this-season/	HP					1	1	0	1		1	1				1	1	1	1			1	1	1	1		1			1	1			1	1						1		1
134	https://www.cottercrunch.com/immunity-boosting-smoothies/	B		1	1	1	1	4	0						1		1	1		1				1	1	1	1		1	1	1	1							1
135	http://news.mit.edu/2018/nanoparticles-give-immune-cells-boost-0709	P		1	1		1	3	0		1
136	https://draxe.com/how-to-boost-your-immune-system/	C		1	1	1	1	4	0	1	1	1	1	1	1	1				1		1	1	1			1		1	1	1	1	1
137	http://www.vive-organic.com/product/immunity-boost/	C					1	1	0											1		1	1		1							1
138	https://www.cleaneatingmag.com/clean-diet/immunity	EXCLUDE						0
139	https://www.sportsdietitians.com.au/sda-blog/boosting-immune-system/	P			1		1	2	0	1			1				1	1						1		1	1		1	1		1		1								1					1
140	https://www.verochiropractic.com/how-chiropractic-care-can-help-boost-your-immunity/	P		1	1		1	3	0	1	1		1																							1
141	https://www.pharmacytimes.com/publications/issue/2017/september2017/nutritional-supplements-marketed-to-boost-the-immune-system	N		1	1	1	1	4	0	1	1	1	1			1	1	1		1		1	1	1			1	1	1		1	1	1	1		1	1	1	1
142	https://www.sleepscore.com/3-ways-to-boost-immunity-and-sleep/	C			1	1	1	3	0	1							1	1	1	1				1			1				1	1		1		1
143	https://good4u.co/2016/12/02/top-10-foods-to-boost-your-immune-system/	C		1	1		1	3	0	1	1	1	1		1	1	1	1	1	1			1	1	1	1	1	1			1	1							1
144	https://www.mindful.org/train-brain-boost-immune-system/	NP		1	1		1	3	0	1	1	1	1	1																				1		1							1
145	https://www.healthspan.co.uk/advice/5-ways-to-boost-your-immunity	C			1		1	2	0	1		1	1				1	1	1			1	1	1	1		1	1	1		1	1	1			1	1				1	1					1
146	https://www.fitnessmagazine.com/health/conditions/cold/cold-prevention-tips/	N		1			1	2	0	1		1	1				1	1	1					1		1	1		1		1	1	1	1	1		1		1			1
147	https://www.breastcancer.org/tips/immune/boost	NP			1		1	2	0	1	1																					1	1	1		1
148	https://www.sarahremmer.com/8-powerful-immune-boosting-foods-that-your-kids-should-be-eating/	B		1	1		1	3	0	1		1	1		1		1		1					1			1	1		1	1	1		1			1	1	1		1	1
149	https://www.today.com/health/immune-boosters-t116429	N		1	1	1	1	4	0	1			1				1	1	1		1		1	1			1	1	1	1	1	1	1	1		1	1		1		1						1
150	https://www.womanandhome.com/health-and-wellbeing/foods-to-boost-your-immune-system-2-118939/	N			1		1	2	0	1		1	1			1	1	1	1				1	1		1	1	1	1	1	1	1	1	1			1				1	1
151	https://experiencelife.com/article/how-forests-boost-immunity/	N			1		1	2	0	1	1					1																				1
152	http://www.beyondyoga.com/blog/immunity-boost/	C		1	1		1	3	0	1			1										1							1
153	https://www.sciencedaily.com/releases/2015/04/150416112826.htm	N		1	1	1	1	4	0			1											1				1	1														1
154	https://www.nbcnews.com/better/pop-culture/feeling-sick-ish-i-went-drip-bar-immunity-boost-here-ncna843406	N		1	1		1	3	0	1			1				1	1										1	1		1
155	http://www.pnas.org/content/100/4/1855	S		1	1	1	1	4	0	1				1		1
156	https://medium.com/@daynebarkley/how-to-easily-implement-daily-cold-showers-to-boost-your-immune-system-and-cognitive-function-32b3b7cdbd94	B		1	1		1	3	0	1			1																														1
157	https://georgefox.cafebonappetit.com/7-foods-to-boost-your-immunity/	C			1	1	1	3	0	1		1	1				1	1	1				1	1		1	1				1	1	1	1	1	1			1								1
158	https://www.ucihealth.org/blog/2017/04/boost-your-immunity	P		1	1		1	3	0	1	1	1	1			1	1	1	1					1			1	1	1			1	1	1		1						1
159	https://www.cleanplates.com/eat/tips-eat/5-ways-boost-immunity-winter/	HP		1	1	1	1	4	0	1	1	1	1				1	1					1	1	1	1	1	1				1	1	1		1						1		1
160	https://www.washingtonpost.com/lifestyle/wellness/when-healings-needed-seek-out-these-immunity-boosting-foods/2017/11/28/a58ea37e-cee2-11e7-a1a3-0d1e45a6de3d_story.html	N		1	1	1	1	4	0	1		1	1				1	1			1			1	1	1	1	1			1	1		1					1		1						1
161	https://www.nature.com/articles/nature22497	EXCLUDE						0
162	https://www.netdoctor.co.uk/healthy-eating/a27282/can-you-boost-your-immune-system-through-diet/	HP		1	1		1	3	0	1			1				1	1						1		1	1	1			1	1	1	1		1			1								1
163	https://anitabean.co.uk/tips-boosting-immunity-athletes/	B		1	1	1	1	4	0	1		1	1				1	1	1					1			1	1	1		1	1		1	1				1
164	http://dieteticdirections.com/five-scientifically-proven-ways-to-boost-immunity/	B		1	1		1	3	0	1			1				1							1					1			1	1	1		1
165	https://www.healthnewsreview.org/2015/10/immune-boost-bunk/	P		1	1	1	1	4	0	1			1											1								1	1	1				1
166	https://www.womenshealthmag.com/health/a19947150/boost-your-immunity/	N		1	1		1	3	0	1			1				1										1	1				1	1	1		1		1
167	https://www.huffingtonpost.ca/2012/02/06/immune-system-foods_n_1257903.html	N			1			1	0	1		1	1				1	1	1	1			1	1		1	1	1	1	1		1			1						1	1		1
168	https://www.betternutrition.com/checkout/boost-immunity-supplements	HP		1	1		1	3	0	1			1				1		1			1	1	1			1	1	1	1	1	1	1	1		1			1			1					1
169	https://6abc.com/health/eating-pumpkin-may-help-boost-immunity/4523268/	N		1	1		1	3	0						1		1							1								1
170	https://riordanclinic.org/2011/11/seasonal-defense-boosting-your-immune-system/	C					1	1	0	1	1		1				1	1	1				1	1			1	1	1	1	1	1	1	1					1							1	1
171	https://abcnews.go.com/GMA/story?id=125497&page=1	N			1		1	2	0	1							1						1	1			1	1			1	1						1	1			1					1
172	https://well.blogs.nytimes.com/2009/10/14/phys-ed-does-exercise-boost-immunity/	N		1	1	1	1	4	0	1		1	1																				1				1	1
173	https://www.personanutrition.com/blog/herbs-to-naturally-boost-immune-system/	C		1	1		1	3	0	1			1			1							1							1						1
174	https://www.express.co.uk/life-style/health/362322/How-to-boost-a-battered-immune-system	N		1	1		1	3	0	1		1	1				1	1	1					1			1		1		1	1	1			1					1	1
175	https://www.yogajournal.com/poses/immunity-boost	N		1	1		1	3	0	1																										1
176	http://www.theiv.ca/top-foods-nutrients-boost-immune-system/	C			1			1	0	1		1			1	1	1		1				1	1			1	1			1	1												1			1
177	https://www.westchesterhealth.com/blog/10-foods-that-boost-your-immune-system/	EXCLUDE
178	https://www.psychologytoday.com/us/articles/200608/immune-boost-is-spinal-zap	N		1	1		1	3	0	1		1	1	1																		1	1	1		1
179	https://www.wiparkinson.org/9-power-food-that-boost-immunity/	NP		1	1		1	3	0	1	1	1	1				1		1			1	1	1			1	1		1	1	1			1				1		1	1
180	https://www.cookinglight.com/eating-smart/nutrition-101/immunity-boosting-recipes	HP		1	1		1	3	0	1			1				1	1		1			1	1	1							1							1		1	1		1
181	https://slate.com/technology/2014/12/boost-your-immunity-cold-and-flu-treatments-suppress-innate-immune-system.html	EXCLUDE						0
182	https://medicorx.com/best-ways-boost-your-immune-system/	C			1		1	2	0	1	1				1		1	1	1			1	1	1			1	1			1	1		1		1
183	https://www.telegraph.co.uk/news/uknews/2569640/Music-can-boost-your-immune-system.html	N		1	1		1	3	0	1																										1
184	https://www.stivesretirementliving.com.au/boost-immunity-naturally/	C			1	1	1	3	0	1		1	1		1		1	1	1	1	1		1	1	1	1	1	1		1	1	1							1			1		1			1
185	https://med.stanford.edu/news/all-news/2012/06/study-explains-how-stress-can-boost-immune-system.html	P		1	1	1	1	4	0
186	https://www.cbsnews.com/news/eating-boogers-may-boost-immunity-scientist-suspects/	N		1	1	1	1	4	0	1
187	https://www.irishtimes.com/news/health/boost-your-immune-system-in-12-steps-1.1191152	N		1	1		1	3	0	1	1						1		1				1	1				1			1	1	1	1	1	1		1	1							1
188	http://www.foxnews.com/health/2015/01/10/6-foods-to-boost-your-immune-system.html	N		1	1		1	3	0	1		1	1			1	1	1	1				1	1			1	1	1	1		1									1	1					1
189	https://www.aptaclub.co.uk/article/supporting-their-immune-system	C			1	1	1	3	0	1		1					1	1	1					1		1	1	1	1		1	1							1								1
190	https://www.livescience.com/34910-massage-benefits-immune-system-100908.html	N			1		1	2	0			1				1																				1
191	https://www.muscleforlife.com/boost-immune-system/	C		1		1	1	3	0	1	1	1				1	1	1	1			1	1	1			1	1	1	1	1	1	1	1		1			1	1		1					1
192	https://www.wishgardenherbs.com/herbal-remedies/Immune-Boost-For-Pregnancy-351/?return	C					1	1	0													1	1							1
193	https://www.teamusa.org/USA-Triathlon/News/Blogs/Fuel-Station/2016/January/19/Foods-to-Boost-Immunity	NP		1	1	0	1	3	0								1							1			1	1			1	1	1	1	1									1
194	https://www.aarp.org/health/healthy-living/info-09-2012/immune-boosting-foods.html	NP		1	1	0	1	3	0	1							1	1						1				1			1	1										1					1
195	https://www.griswoldhomecare.com/blog/immunization-and-the-elderly-natural-ways-to-boost-seniors-immune-systems/	C		0	1	1	1	3	0	1	1		1				1							1			1				1	1	1					1				1					1
196	http://www.drmahaliafreed.com/7-ways-to-boost-your-immune-system-during-pregnancy/	B		1	0	1	1	3	0	1		1	1				1					1	1	1			1		1		1	1		1		1
197	https://drhoffman.com/article/nutrients-that-boost-immunity-2/	C		1	1	0	1	3	0	1	1	1		1			1	1	1			1						1	1		1	1										1
198	https://www.harpersbazaar.com/beauty/health/advice/a1468/immune-boosting-foods/	N		1	1	0	1	3	0	1	1		1				1	1	1	1	1		1	1	1	1	1	1		1	1	1				1	1		1								1
199	https://www.biokplus.com/blog/en_US/kids-health/five-easy-and-surprising--ways-to-boost-kids-immunity	HP		0	1	1	1	3	0	1			1											1			1	1	1	1		1	1	1					1								1
200	https://www.freychiropractic.com/chiropractic-care-may-help-boost-immunity/	C		0	0	0	1	1	0	1		1	1
201	http://www.eatmoveglow.com/2016/04/04/5-steps-to-immune-boosting-salad/	B		1	1	0	1	3	0		1						1	1					1	1	1	1				1	1	1															1
202	https://www.bewell.com/blog/7-ways-to-supercharge-your-immune-system/	B		1	1	0	1	3	0	1	1	1	1			1	1		1				1				1	1	1	1		1		1		1
203	https://naqld.org/app/uploads/2014/01/Boost-your-immune-system.pdf	NP		0	0	0	1	1	0	1			1				1	1					1	1	1		1	1			1	1	1	1	1		1		1								1
204	https://www.bustle.com/articles/140631-7-tips-for-boosting-your-immune-system	N		1	1	1	1	4	0	1			1		1		1	1						1			1	1	1	1	1	1	1	1		1
						Typology
						C	Commercial
						N	News
						B	Blog
						P	Professional
						HP	Health portal
						NP	No-profit
						O	Other
						G	Government
						S	Scientific journals
[truncated: 8 more columns]
