# Supplementary material for: Boosting the Immune System, From Science to Myth: Analysis the Infosphere With Google
Source: Front Med (Lausanne). 2019 Jul 25;6:165. doi: 10.3389/fmed.2019.00165 (PMC6673706; doi:10.3389/fmed.2019.00165)
Supplement: Supplementary File 3 — Concordance of the key word “University” in news webpages. [file Table_3.XLSX]

## Sheet: concordance_user_PietroGhezzi_a
Reference	website	Left	KWIC*	Right
_	irishtimes.com	sluggish and below par. Eight to 10 glasses a day is recommended. 2. Have a good laugh: Doctor Lee Berk at Loma Linda	University	School of Medicine, California, who pioneered research into the biochemical and physiological effects of positive
_	irishtimes.com	exercise to help you get in touch with your body and breathing. 11. Be friends: In 1997 researchers from Carnegie Mellon	University	in Pittsburgh examined how important friendships are to the immune system. After questioning 276 people about their
_	womenshealthmag.com	–a stress hormone that can weaken immunity. Get Plenty of Sleep Here's another reason to get to bed early tonight:	University	of Chicago researchers found that anitbodies in sleep-deprived people who received a vaccine were weaker than those
_	bbc.co.uk	, this part of the immune system identifies the cells that can kill them and sends them into battle. At Glasgow	University	, researchers are using laser microscopy to look at some of these cells as they move and interact in the immune system.
_	cbsnews.com	to conduct a study to prove it, CBC News in Canada reports. Scott Napper, an associate professor of biochemistry at the	University	of Saskatchewan in Canada, told CTV News in Saskatoon that he proposed this theory one day while teaching a classroom
_	cbsnews.com	the idea," he said. But Dr. William Schaffner, chairman of the department of preventive medicine at Vanderbilt	University	and past president of the National Foundation of Infectious Diseases, told ABC News that he doesn't buy this theory --
_	sfgate.com	and business for several online publications. She holds a Master of Science in microbiology from India's HNB Garhwal	University	and a Master of Pharmaceutical Business Management from ICFAI University. Photo Credits Thinkstock Images/
_	sfgate.com	in microbiology from India's HNB Garhwal University and a Master of Pharmaceutical Business Management from ICFAI	University	. Photo Credits Thinkstock Images/Comstock/Getty Images Cite this Article Choose Citation Style MLAAPAChicago (B)
_	nbcnews.com	your blood to see if you have vitamin deficiencies before trying this is a good idea. Dr. David L. Katz, director of Yale	University	Prevention Research Center, Griffin Hospital, conducted a study on the efficacy of IV micronutrient therapy for
_	theguardian.com	your immune function and leave you more prone to infection," says Professor Janet Lord, an immunologist from the	University	of Birmingham. "Chronic stress produces a stress hormone called cortisol that kills or neutralises your immune cells
_	eatthis.com	season, and not just because the warm comfort food is a nostalgic throwback to mom taking care of you. According to the	University	of California Los Angeles, this soup has an anti-inflammatory effect and calms down inflammation in the upper
_	eatthis.com	effect and calms down inflammation in the upper respiratory tract that takes place when you develop a cold. The	university	also noted that the soup helps relieve nasal congestion. 2 Ginger Tea Shutterstock When it comes to treating a common
_	eatthis.com	to a review conducted by the National Centre for Epidemiology and Population Health, at the Australian National	University	, vitamin C is helpful in preventing the common cold for people exposed to sickness-inducing environments, such as
_	eatthis.com	. It also cut down the duration of symptoms by 8 percent in adults and 14 percent in children. 13 Broccoli Shutterstock	University	of California in Los Angeles researchers reported that broccoli can be a great addition to your diet if you're trying to
_	eatthis.com	a Cold article. 28 Mushrooms Shutterstock Mushrooms are great for boosting your immunity, according to a study by the	University	of Florida's Institute of Food and Agricultural Sciences. Research suggests that participants who ate shiitake
_	consciouslifestylemag.com	leaves was shown to have powerful and measurable antioxidant and anti-inflammatory effects. In a study at the	University	of Florida, white blood cells isolated from 10 people were incubated with hydrogen peroxide, which causes oxidative
_	consciouslifestylemag.com	and find creative solutions. Her unconventional journey–from hard-core medical research on the faculty at the	University	of California Medical School in San Francisco(UCSF) to delivering programs about the healing wisdom of our cells,
_	telegraph.co.uk	a percussion instrument along with the music also benefited from the immune boost. The researchers, from Sussex	University	and the Max Planck Institute in Leipzig, Germany, say their findings demonstrate how music could be used to help aid
_	forbes.com	mood over time. Shutterstock In the new study, the team of researchers from the Icahn School of Medicine at Mount Sinai,	University	of California at San Francisco, and Harvard Medical School had 94 women come to the Chopra Center for Well Being in
_	forbes.com	is a clear and quantifiable change in how our bodies function," said Rudolph Tanzi, who holds positions both at Harvard	University	and Massachusetts General Hospital, in a statement. "Meditation is one of the ways to engage in restorative
_	pharmacytimes.com	of the immune system. Nurs Stand. 2013;27(19):35-42. What does and doesn't affect immune system. Michigan State	University	ScienceDaily website. http://sciencedaily.com/releases/2008/02/080204172208.htm. Published February 8,
_	nytimes.com	mice. They also had more severe symptoms. In the second experiment, published in the same journal, scientists from the	University	of Illinois and other schools first infected laboratory mice with flu. One group then rested; a second group ran for a
_	nytimes.com	if you exercise moderately," says Mary P. Miles, PhD, an associate professor of exercise sciences at Montana State	University	and the author of an editorial about exercise and immunity published in the most recent edition of the journal Exercise
_	nytimes.com	has been suggested," says Nicolette Bishop, an associate professor of sport and exercise sciences at Loughborough	University	and the author of a review article about exercise and immunity published in January. A telling new study, published in
_	nytimes.com	understanding why, once you've caught a bug, intense exercise can make the symptoms and severity worse. In work at the	University	of Illinois, reported last month in the journal Exercise and Sport Sciences Review, some of the same scientists who'd
_	nytimes.com	, and this is true in both mice and men, says Jeffrey A. Woods, a professor of kinesiology and community health at the	University	of Illinois and one of the scientists involved, viruses evoke an increase in what are called T1-type helper immune
_	nytimes.com	to the T1 fire. But the balance between the T1- and T2-helper cells must be exquisitely calibrated. In the mice at the	University	of Illinois, moderate exercise subtly hastened the shift from a T1 response to a T2-style immune response – not by much,
_	nytimes.com	now. Here's an interesting tidbit from Dr. David Nieman, the Human Performance Lab director at Appalachian State	University	. After conducting about 50 studies on marathoners who are 6 times more likely to get sick after a race–Nieman found this
_	prevention.com	and intestinal tract free of disease-causing germs. Although probiotic supplements are available, a study from the	University	of Vienna in Austria found that a daily 7-ounce dose of yogurt was just as effective in boosting immunity as popping
_	prevention.com	if you're pregnant or planning to be, you should ask your doctor about how much you need). Chicken soup Getty Images When	University	of Nebraska researchers tested 13 brands, they found that all but one (chicken-flavored ramen noodles) blocked the
_	businessinsider.com	your immune function and leave you more prone to infection," says Professor Janet Lord, an immunologist from the	University	of Birmingham. "Chronic stress produces a stress hormone called cortisol that kills or neutralizes your immune cells
_	shape.com	to music can boost your immunity. "The trick is finding music that soothes your soul," Berk says. Scientists at McGill	University	in Montreal found that listening to music that sent "shivers down the spine" stimulated the same "feel-good" parts of
_	shape.com	to noise can lead to long-lasting changes in blood pressure, cholesterol levels and immune function. Cornell	University	research found that women who work in moderately noisy offices produce more of the stress hormone adrenaline and may be
_	shape.com	tended to live 12 years longer than pessimists. A recent study by Anna L. Marsland, Ph.D., R.N., a psychologist at the	University	of Pittsburgh Medical Center, found that people who were negative, moody, nervous and easily stressed had a weaker
_	shape.com	. "Dehydration lowers resistance," says Lee Berk, Dr.P.H.,M.P.H., an assistant professor of family medicine at the	University	of California, Irvine, College of Medicine. (Check out these 6 Hot, Healthy Drinks to Warm You This Winter for
_	shape.com	, lowers blood pressure and reduces muscle tension. Use Your BrainCertain kinds of thinking may boost immunity.	University	of California, Berkeley, neuroscientist Marian Diamond, Ph.D., found that playing bridge stimulated women's
_	nursingtimes.net	. Where did the story come from? The study was carried out by researchers from the Linus Pauling Institute, Oregon State	University	in the US and was funded by the National Institutes of Health. The study was published in the peer-reviewed journal
_	foxnews.com	more than just soothe a sore throat and keep you hydrated, it may keep your airways healthy, as well. Researchers at the	University	of Nebraska found that chicken soup deters movement of inflammatory white cells, which can help prevent colds by
_	foxnews.com	cultures" on the yogurt label as research shows they may stimulate your immune system to fight disease. A study from the	University	of Vienna in Austria showed that a daily yogurt (7 ounces) was as effective in promoting immunity as taking pills.
	*Key Word In Context
